# Supplementary material for: In silico and in vitro evaluation of the anti-virulence potential of patuletin, a natural methoxy flavone, against Pseudomonas aeruginosa
Source: PeerJ. 2024 Feb 1;12:e16826. doi: 10.7717/peerj.16826 (PMC10838535; doi:10.7717/peerj.16826)
Supplement: Supplemental Information 2 [file peerj-12-16826-s002.xlsx]

## Sheet: Sheet1
Inhibitors	Control (untreated) isolates	Average	Patuletin treated isolates absorbance (biofilm formation ability)	Average Patuletin treated isolates absorbance (% biofilm formation ability)	Average % reduction
	absorbance (OD570)	Control (untreated) isolates
Isolate No		absorbance (OD570))
PA 27853	R1= 0.405		R1= 0.180
	R2= 0.370	0.385	R2= 0.200	0.185 (48%)	0.52
	R3= 0.385		R3= 0.175
PA 1	R1= 0.474		R1= 0.187
	R2= 0.460	0.456	R2= 0.196	0.192 (42%)	0.58
	R3= 0.434		R3= 0.193
